# Supplementary material
Source: ML conference proceedings conference paper supplement (https://proceedings.mlr.press/v108/balle20a.html)
Supplement: Supplementary file [file balle20a-supp.pdf]

# Appendix of “Hypothesis Testing Interpretations and Rényi Differential Privacy”

Borja Balle      Gilles Barthe      Marco Gaboardi  
Justin Hsu      Tetsuya Sato

February 29, 2020

## A Weak version of Birkhoff-von Neumann Theorem (Theorem 11)

**Theorem 1** (Weak Birkhoff-von Neumann theorem). *Let  $k, l \in \mathbb{N}$  and  $k > l$ . For any  $\gamma: k \rightarrow \text{Prob}(l)$ , there are  $\gamma_1, \gamma_2, \dots, \gamma_N: k \rightarrow l$  and  $0 \leq a_1, a_2, \dots, a_N \leq 1$  such that  $\sum_{m=1}^N a_m = 1$  and  $\gamma(i) = \sum_{m=1}^N a_m \mathbf{d}_{\gamma_m(i)}$  for any  $1 \leq i \leq k$ .*

The cardinal  $k$  can be relaxed to countable infinite cardinal  $\omega$ , and then the families  $\{\gamma_j\}_j$  and  $\{a_j\}_j$  may be countable infinite.

*Proof.* Consider the following matrix representation  $f$  of  $\gamma$ :

$$f = \begin{pmatrix} f_{1,1} & \cdots & f_{l,1} \\ \vdots & & \vdots \\ f_{1,k} & \cdots & f_{l,k} \end{pmatrix}.$$

where  $f_{i,j} = \gamma(i)(j)$  and  $\sum_{j=1}^l f_{i,j} = 1$  for any  $1 \leq i \leq k$ .

For any  $h: k \rightarrow l$ , the matrix representation  $g$  of  $(\{x \mapsto \mathbf{d}_x\} \circ h)$  is

$$g = \begin{pmatrix} g_{1,1} & \cdots & g_{l,1} \\ \vdots & & \vdots \\ g_{1,k} & \cdots & g_{l,k} \end{pmatrix}$$

satisfying that for any  $1 \leq i \leq l$ , there is exactly  $1 \leq j \leq k$  such that  $g_{i,j} = 1$  and  $g_{i,s} = 0$  for  $s \neq j$ . Conversely, any matrix  $g$  satisfying this condition corresponds to some function  $h: k \rightarrow l$ . Consider the family  $G$  of matrix representations of maps of the form  $(\{x \mapsto \mathbf{d}_x\} \circ h)$ . We give an algorithm decomposing  $f$  to a convex sum of  $g$ :

1. Let  $r_0 = 1$  and  $\tilde{f}_0 = f$ . We have  $\sum_j (\tilde{f}_0)_{i,j} = r_0$  for all  $1 \leq i \leq l$ .
2. For given  $0 \leq r_m \leq 1$  and  $\tilde{f}_m$  satisfying  $\sum_j (\tilde{f}_m)_{i,j} = r_m$  for all  $1 \leq i \leq l$ ,

we define  $g_{m+1} \in G$ ,  $\alpha_{m+1} \in [0, 1]$ ,  $\tilde{f}_{m+1}$  and  $r_{m+1} \in [0, 1]$  as follows:

$$\alpha_{m+1} = \min_s \max_t (\tilde{f}_m)_{s,t}, \quad r_{m+1} = r_m - \alpha_{m+1},$$

$$(g_{m+1})_{i,j} = \begin{cases} 1 & j = \operatorname{argmax}_s (\tilde{f}_m)_{i,s} \\ 0 & \text{(otherwise)} \end{cases}, \quad \tilde{f}_{m+1} = \tilde{f}_m - \alpha_{m+1} \cdot g_{m+1}.$$

3. If  $r_{s+1} = 0$  then we terminate. Otherwise, we repeat the previous step.

In each step, we obtain the following conditions:

- We have  $g_{m+1} \in G$  because  $g_{m+1}$  can be written as  $g_{m+1} = \{x \mapsto \mathbf{d}_x\} \circ (\lambda i. \operatorname{argmax}_s (\tilde{f}_m)_{i,s})$ .

- We have  $0 < \alpha_{m+1}$  whenever  $0 < r_m$  because

$$\alpha_{m+1} = 0 \iff \exists i. \max_j (\tilde{f}_m)_{i,j} = 0 \implies \exists i. r_m = \sum_j (\tilde{f}_m)_{i,j} = 0.$$

- We have  $0 \leq (\tilde{f}_{m+1})_{i,j} \leq 1$  for any  $(i, j)$  from the following equation:

$$(\tilde{f}_{m+1})_{i,j} = \begin{cases} (\tilde{f}_m)_{i,j} - \min_t \max_s (\tilde{f}_m)_{t,s} & \text{if } j = \operatorname{argmax}_s (\tilde{f}_m)_{i,s} \\ (\tilde{f}_m)_{i,j} & \text{otherwise} \end{cases}.$$

When  $i = \operatorname{argmin}_s \max_t (\tilde{f}_m)_{s,t}$  and  $j = \operatorname{argmax}_s (\tilde{f}_m)_{i,s}$ , we obtain  $(\tilde{f}_{m+1})_{i,j} = 0$  while  $0 < (\tilde{f}_{m+1})_{i,j}$ . This implies that the number of 0 in  $\tilde{f}_m$  increases in this operation.

- We also have  $\sum_j (\tilde{f}_{m+1})_{i,j} = r_{m+1}$  for all  $1 \leq i \leq k$  because

$$\sum_j (\tilde{f}_{m+1})_{i,j} = \sum_j (\tilde{f}_m)_{i,j} - \alpha_{m+1} \cdot \sum_j (\tilde{g}_{m+1})_{i,j} = r_m - \alpha_{m+1} \cdot 1 = r_{m+1}.$$

Therefore the construction of  $g_l \in G$ ,  $\alpha_l \in [0, 1]$ ,  $\tilde{f}_l$  and  $r_l \in [0, 1]$  terminates within  $k \cdot l$  steps. When the construction terminates at the step  $N$  ( $r_N = 0$  also holds), we have a convex decomposition of  $f$  by  $f = \sum_{m=1}^N \alpha_m \cdot g_m$  where  $\sum_{m=1}^N \alpha_m = 1$ . This implies By taking  $\gamma_1, \gamma_2, \dots, \gamma_N: k \rightarrow l$  such that  $g_m$  is a matrix representation of  $(\{x \mapsto \mathbf{d}_x\} \circ \gamma_m)$ , we obtain  $\gamma(i) = \sum_{m=1}^N \alpha_m \mathbf{d}_{\gamma_m(i)}$  for any  $1 \leq i \leq k$  with  $0 \leq a_1, a_2, \dots, a_N \leq 1$  and  $\sum_{m=1}^N a_m = 1$ .  $\square$

## B Omitted Proofs

### B.1 Compositions of probabilistic processes

For simplicity, we introduce the composition operator of probabilistic processes (inspired from [Giry, 1982]). For any  $\gamma_1: X \rightarrow \operatorname{Prob}(Z)$  and  $\gamma: Z \rightarrow \operatorname{Prob}(Y)$ , we define their composition  $(\gamma \bullet \gamma_1): X \rightarrow \operatorname{Prob}(Y)$  by  $(\gamma \bullet \gamma_1)(x) \stackrel{\text{def}}{=} \gamma(\gamma_1(x))$ . It is easy to check that the composition  $(\gamma \bullet \gamma_1)$  satisfies  $(\gamma \bullet \gamma_1)(\mu) = \gamma(\gamma_1(\mu))$  for every  $\mu \in \operatorname{Prob}(X)$ .

- The composition operator  $\bullet$  is associative:  $\gamma \bullet (\gamma_1 \bullet \gamma_2) = (\gamma \bullet \gamma_1) \bullet \gamma_2$  holds for all  $\gamma_2: W \rightarrow \text{Prob}(X)$ ,  $\gamma_1: X \rightarrow \text{Prob}(Z)$ , and  $\gamma: Z \rightarrow \text{Prob}(Y)$ .
- The function  $\eta_X: X \rightarrow \text{Prob}(X)$  defined by  $\eta_X = \{x \mapsto \mathbf{d}_X\}$  is the unit of operator  $\bullet$ : we have  $\gamma \bullet \eta_X = \gamma$  and  $\eta_Y \bullet \gamma = \gamma$  for all  $\gamma: X \rightarrow \text{Prob}(Y)$

Thanks to the unit law and associativity of  $\bullet$  as an abuse of notations, we define

- $(\gamma \bullet \gamma_1): X \rightarrow \text{Prob}(Z)$  for  $\gamma_1: X \rightarrow Z$  and  $\gamma: Z \rightarrow \text{Prob}(Y)$  by  $\gamma \bullet (\eta_Z \circ \gamma_1)$ .
- $(\gamma \bullet \gamma_1): X \rightarrow \text{Prob}(Z)$  for  $\gamma_1: X \rightarrow \text{Prob}(Z)$  and  $\gamma: Z \rightarrow Y$  by  $(\eta_Y \circ \gamma) \bullet \gamma_1$ .
- $(\gamma \bullet \gamma_1): X \rightarrow \text{Prob}(Z)$  for  $\gamma_1: X \rightarrow Z$  and  $\gamma: Z \rightarrow Y$  by  $(\eta_Y \circ \gamma) \bullet (\eta_Z \circ \gamma_1)$ , which is equal to  $\eta_Y \circ (\gamma \circ \gamma_1)$ .

Notice that,  $\gamma(\mu) \in \text{Prob}(Y)$  defined under  $\gamma: X \rightarrow Y$  and  $\mu \in \text{Prob}(X)$  is exactly  $(\eta_Y \circ \gamma)(\mu)$ .

## B.2 Proof of the data-processing inequality of $k$ -cuts

**Lemma 2.** *For any divergence  $\Delta$ , every  $k$ -cut  $\overline{\Delta}^k$  satisfies data-processing inequality.*

*Proof.* We consider the  $k$ -cut of  $\Delta$  with respect to a set  $Y$  satisfying  $|Y| = k$

$$\overline{\Delta}_X^k(\mu_1 || \mu_2) \stackrel{\text{def}}{=} \sup_{\gamma: X \rightarrow \text{Prob}(Y)} \Delta_Y(\gamma(\mu_1) || \gamma(\mu_2)).$$

For every pair  $\mu_1, \mu_2 \in \text{Prob}(X)$ , and any function  $\gamma_1: X \rightarrow \text{Prob}(Z)$ , we obtain the data-processing inequality

$$\begin{aligned} \overline{\Delta}_Z^k(\gamma_1(\mu_1) || \gamma_1(\mu_2)) &= \sup_{\gamma: Z \rightarrow \text{Prob}(Y)} \Delta_Y(\gamma(\gamma_1(\mu_1)) || \gamma(\gamma_1(\mu_2))) \\ &= \sup_{\gamma: Z \rightarrow \text{Prob}(Y)} \Delta_Y((\gamma \bullet \gamma_1)(\mu_1) || (\gamma \bullet \gamma_1)(\mu_2)) \\ &\leq \sup_{\gamma': X \rightarrow \text{Prob}(Y)} \Delta_Y(\gamma'(\mu_1) || \gamma'(\mu_2)) = \overline{\Delta}_X^k(\mu_1 || \mu_2). \end{aligned}$$

The inequality is obtained by the inclusion

$$\{(\gamma \bullet \gamma_1): X \rightarrow \text{Prob}Y \mid \gamma: Z \rightarrow \text{Prob}(Y)\} \subseteq \{\gamma': X \rightarrow \text{Prob}(Y)\}.$$

□

## B.3 Proof of Lemma 10

**Lemma 3** (Lemma 10). *If a divergence  $\Delta$  has the data-processing inequality, we have the inequality  $\overline{\Delta}^k \leq \Delta$  and the equality  $\overline{\Delta}_Y^k = \Delta_Y$  for any set  $Y$  with  $|Y| = k$ .*

*Proof.* We consider the  $k$ -cut of  $\Delta$  with respect to a set  $W$  satisfying  $|W| = k$

$$\overline{\Delta}_X^k(\mu_1 || \mu_2) \stackrel{\text{def}}{=} \sup_{\gamma: X \rightarrow \text{Prob}(W)} \Delta_W(\gamma(\mu_1) || \gamma(\mu_2)).$$

Thanks to the data-processing inequality of  $\Delta$ , we have  $\overline{\Delta}^k \leq \Delta$ : for every pair  $\mu_1, \mu_2 \in \text{Prob}(X)$ , we obtain

$$\overline{\Delta}_X^k(\mu_1 || \mu_2) = \sup_{\gamma: X \rightarrow \text{Prob}(W)} \Delta_W(\gamma(\mu_1) || \gamma(\mu_2)) \leq \Delta_X(\mu_1, \mu_2).$$

Now, we consider a set  $Y$  with  $|Y| = k$ . We already have  $\overline{\Delta}_Y^k \leq \Delta_Y$ . We want to prove  $\Delta_Y \leq \overline{\Delta}_Y^k$ . Since  $|Y| = |W| = k$ , there is a bijection  $f: Y \rightarrow W$ . We then obtain for every pair  $\nu_1, \nu_2 \in \text{Prob}(Y)$ ,

$$\Delta_Y(\nu_1 || \nu_2) = \Delta_Y(f^{-1}(f(\nu_1)) || f^{-1}(f(\nu_2))) \leq \Delta_W(f(\nu_1) || f(\nu_2)) \leq \overline{\Delta}_Y^k(\nu_1 || \nu_2)$$

The first and second inequalities are obtained by the dataprocessing inequality and the definition of  $k$ -cut respectively.  $\square$

## B.4 Proof of Lemma 13

**Lemma 4** (Lemma 13). *If  $\Delta = \{\Delta_X\}_{X: \text{set}}$  is  $k$ -generated, for any set  $|Y|$  with  $|Y| = k$ , we have*

$$\Delta_X(\mu_1 || \mu_2) = \sup_{\gamma: X \rightarrow \text{Prob}(Y)} \Delta_Y(\gamma(\mu_1) || \gamma(\mu_2)).$$

*Proof.* Suppose that  $\Delta$  is equal to the  $k$ -cut of  $\Delta$  with respect to a set  $W$  satisfying  $|W| = k$ .

$$\Delta_X(\mu_1 || \mu_2) = \overline{\Delta}_X^k(\mu_1 || \mu_2) = \sup_{\gamma: X \rightarrow \text{Prob}(W)} \Delta_W(\gamma(\mu_1) || \gamma(\mu_2)).$$

Since  $\overline{\Delta}^k$  always satisfies data-processing inequality, the divergence  $\Delta$  itself do so. We fix an arbitrary set  $|Y|$  with  $|Y| = k$ . Since  $|Y| = |W| = k$ , there is a bijection  $f: Y \rightarrow W$ . For every pair  $\mu_1, \mu_2 \in \text{Prob}(X)$ , we obtain

$$\begin{aligned} \Delta_X(\mu_1 || \mu_2) &= \sup_{\gamma: X \rightarrow \text{Prob}(W)} \Delta_W(\gamma(\mu_1) || \gamma(\mu_2)) \\ &= \sup_{\gamma: X \rightarrow \text{Prob}(W)} \Delta_W(f(f^{-1}(\gamma(\mu_1))) || f(f^{-1}(\gamma(\mu_2)))) \\ &\leq \sup_{\gamma: X \rightarrow \text{Prob}(W)} \Delta_Y(f^{-1}(\gamma(\mu_1)) || f^{-1}(\gamma(\mu_2))) \\ &= \sup_{\gamma: X \rightarrow \text{Prob}(W)} \Delta_Y((f^{-1} \bullet \gamma)(\mu_1) || (f^{-1} \bullet \gamma)(\mu_2)) \\ &\leq \sup_{\gamma: X \rightarrow \text{Prob}(Y)} \Delta_Y(\gamma(\mu_1) || \gamma(\mu_2)) \leq \Delta_X(\mu_1 || \mu_2). \end{aligned}$$

Here, the first and last inequalities are obtained from the data-processing inequality of  $\Delta$ . The second inequality is proved from the inclusion

$$\{ (f^{-1} \bullet \gamma): X \rightarrow \text{Prob}(Y) \mid \gamma: X \rightarrow \text{Prob}(W) \} \subseteq \{ \gamma: X \rightarrow \text{Prob}(Y) \}.$$

$\square$

## B.5 Proof of Basic Properties of $k$ -generatedness (Lemma 14)

**Lemma 5** (Lemma 14 (1)). *If  $\Delta$  is 1-generated, then  $\Delta$  is constant, i.e. there exists  $c \in [0, \infty]$  such that for every  $X$  and every  $\mu_1, \mu_2 \in \text{Prob}(X)$ , we have  $\Delta_X(\mu_1 || \mu_2) = c$ .*

*Proof.* When  $\Delta$  is 1-generated, there is a singleton set  $\{a\}$  such that, for every pair  $\mu_1, \mu_2 \in \text{Prob}(X)$ ,

$$\Delta_X(\mu_1 || \mu_2) = \sup_{\gamma: X \rightarrow \text{Prob}(\{a\})} \Delta_{\{a\}}(\gamma(\mu_1) || \gamma(\mu_2)).$$

Now, the set  $\text{Prob}(\{a\})$  is a singleton set  $\{\mathbf{d}_a\}$ , and therefore both  $\gamma(\mu_1)$  and  $\gamma(\mu_2)$  are equal to  $\mathbf{d}_a$  for every  $\gamma: X \rightarrow \text{Prob}(\{a\})$  and every pair  $\mu_1, \mu_2 \in \text{Prob}(X)$ . Hence,  $\Delta_X(\mu_1 || \mu_2) = c$  where  $c = \Delta_{\{a\}}(\mathbf{d}_a || \mathbf{d}_a)$ .  $\square$

**Lemma 6** (Lemma 14 (2)). *If  $\Delta$  is  $k$ -generated, then it is also  $k + 1$ -generated.*

*Proof.* Suppose that  $\Delta$  is equal to the  $k$ -cut of  $\Delta$  with respect to a set  $W$  satisfying  $|W| = k$ .

$$\Delta_X(\mu_1 || \mu_2) = \overline{\Delta}_X^k(\mu_1 || \mu_2) = \sup_{\gamma: X \rightarrow \text{Prob}(W)} \Delta_W(\gamma(\mu_1) || \gamma(\mu_2)).$$

Let  $V$  be an arbitrary set with  $|V| = k + 1$ . We define the  $k + 1$ -cut of  $\overline{\Delta}^k$  with respect to the set  $V$ .

$$\overline{\overline{\Delta}}_X^{k+1}(\mu_1 || \mu_2) \stackrel{\text{def}}{=} \sup_{\gamma: X \rightarrow \text{Prob}(V)} \overline{\Delta}_V^k(\gamma(\mu_1) || \gamma(\mu_2)).$$

We then have

$$\begin{aligned} \overline{\overline{\Delta}}_X^{k+1}(\mu_1 || \mu_2) &= \sup_{\gamma: X \rightarrow \text{Prob}(V)} \overline{\Delta}_V^k(\gamma(\mu_1) || \gamma(\mu_2)) \\ &= \sup_{\gamma: X \rightarrow \text{Prob}(V)} \sup_{\gamma_1: V \rightarrow \text{Prob}(W)} \Delta_W(\gamma_1(\gamma(\mu_1)) || \gamma_1(\gamma(\mu_2))) \\ &= \sup_{\gamma: X \rightarrow \text{Prob}(V)} \sup_{\gamma_1: V \rightarrow \text{Prob}(W)} \Delta_W((\gamma_1 \bullet \gamma)(\mu_1) || (\gamma_1 \bullet \gamma)(\mu_2)) \\ &\stackrel{(*)}{=} \sup_{\gamma': X \rightarrow \text{Prob}(W)} \Delta_W(\gamma'(\mu_1) || \gamma'(\mu_2)) = \overline{\Delta}_X^k(\mu_1 || \mu_2) \end{aligned}$$

The equality is obtained by the equality

$$\left\{ (\gamma_1 \bullet \gamma): X \rightarrow \text{Prob}(W) \mid \begin{array}{l} \gamma: X \rightarrow \text{Prob}(V), \\ \gamma_1: V \rightarrow \text{Prob}(W) \end{array} \right\} = \{ \gamma': X \rightarrow \text{Prob}(W) \}$$

The inclusion  $\subseteq$  is obvious. We show the reverse inclusion  $\supseteq$ . Since  $|V| \geq |W|$ , there is a pair of function  $f: W \rightarrow V$  and  $g: V \rightarrow W$  such that  $g \circ f = \text{id}_W$ . Then, every  $\gamma': X \rightarrow \text{Prob}(W)$  can be decomposed into  $\gamma' = \gamma_1 \bullet \gamma$  where  $\gamma = (f \bullet \gamma')$  and  $\gamma_1 = g$  (strictly,  $\gamma = ((\eta_V \circ f) \bullet \gamma')$  and  $\gamma_1 = \eta_W \circ g$ ).  $\square$

**Lemma 7** (Lemma 14 (3)). *If  $\Delta$  has the data-processing inequality, then it is at least  $\infty$ -generated.*

*Proof.* We fix a pair  $\mu_1, \mu_2 \in \text{Prob}(X)$ . The set  $Y = \text{supp}(\mu_1) \cup \text{supp}(\mu_2)$  is at most countable. Hence there are two functions  $f: X \rightarrow \mathbb{N}$  and  $g: \mathbb{N} \rightarrow X$  such that  $(g \circ f)(x) = x$  for every  $x \in Y$ . We then have  $\mu_1 = (g \circ f)(\mu_1)$  and  $\mu_2 = (g \circ f)(\mu_2)$ . Thus,

$$\begin{aligned} \Delta_X(\mu_1 || \mu_2) &= \Delta_X((g \circ f)(\mu_1) || (g \circ f)(\mu_2)) \\ &\leq \Delta_{\mathbb{N}}(f(\mu_1) || f(\mu_2)) \\ &\leq \sup_{\gamma: X \rightarrow \text{Prob}(\mathbb{N})} \Delta_{\mathbb{N}}(\gamma(\mu_1) || \gamma(\mu_2)) \\ &\leq \Delta_X(\mu_1 || \mu_2). \end{aligned}$$

The last part is an  $\infty$ -cut. The first and last inequality is obtained by the data-processing inequality. The second one is obvious ( $f: X \rightarrow \mathbb{N}$  is regarded as  $\{x \mapsto \mathbf{d}_{f(x)}\}: X \rightarrow \text{Prob}(\mathbb{N})$ ).  $\square$

**Lemma 8** (Lemma 14 (4)). *Every  $k$ -cut of a divergence  $\Delta$  is always  $k$ -generated.*

*Proof.* We can prove  $\overline{\Delta}^k = \overline{\Delta}^k$  in a almost the same way as Lemma 14 (2).  $\square$

**Continuity of divergence (Lemma 14(3) in general setting)** We can extend the results on divergences in the discrete setting to general measurable setting using the continuity of divergences. We say that a divergence  $\Delta$  is continuous if for any pair  $\mu_1, \mu_2 \in \text{Prob}(X)$ ,

$$\Delta_X(\mu_1 || \mu_2) = \sup_{n \in \mathbb{N}} \sup_{\gamma: X \rightarrow \{0,1,2,\dots,n\}} \Delta_{\{0,1,2,\dots,n\}}(\gamma(\mu_1) || \gamma(\mu_2)).$$

If  $\Delta$  is continuous and satisfies data-processing inequality we have  $\infty$ -generatedness (moreover we show the “countable”-generatedness) as follows:

$$\begin{aligned} &\Delta_X(\mu_1 || \mu_2) \\ &= \sup_{n \in \mathbb{N}} \sup_{\gamma: X \rightarrow \{0,1,2,\dots,n-1\}} \Delta_{\{0,1,2,\dots,n-1\}}(\gamma(\mu_1) || \gamma(\mu_2)) \\ &= \sup_{n \in \mathbb{N}} \sup_{\gamma: X \rightarrow \{0,1,2,\dots,n-1\}} \Delta_{\{0,1,2,\dots,n-1\}}((g_n \circ f_n)(\gamma(\mu_1)) || (g_n \circ f_n)(\gamma(\mu_2))) \\ &= \sup_{n \in \mathbb{N}} \sup_{\gamma: X \rightarrow \{0,1,2,\dots,n\}} \Delta_{\{0,1,2,\dots,n-1\}}(g_n((f_n \bullet \gamma)(\mu_1)) || g_n((f_n \bullet \gamma)(\mu_2))) \\ &\leq \sup_{n \in \mathbb{N}} \sup_{\gamma: X \rightarrow \{0,1,2,\dots,n-1\}} \Delta_{\mathbb{N}}((f_n \bullet \gamma)(\mu_1) || (f_n \bullet \gamma)(\mu_2)) \\ &\leq \sup_{\gamma: X \rightarrow \mathbb{N}} \Delta_{\mathbb{N}}(\gamma(\mu_1) || \gamma(\mu_2)) \leq \overline{\Delta}_X^\infty(\mu_1, \mu_2) \\ &\leq \Delta_X(\mu_1, \mu_2). \end{aligned}$$

Here  $f_n: \{0, 1, 2, \dots, n-1\} \rightarrow \mathbb{N}$  is the inclusion mapping, and  $g_n: \mathbb{N} \rightarrow \{0, 1, 2, \dots, n-1\}$  is defined by  $g_n(k) = k$  if  $(k < n)$  and  $g_n(k) = n-1$  otherwise. We have  $(g_n \circ f_n) = \text{id}_{\{0,1,2,\dots,n-1\}}$ .

The first and last inequalities are obtained from data-processing inequality. The second inequality is obvious.

## B.6 Proof of Lemma 15

**Lemma 9** (Lemma 15). *Consider a divergence  $\Delta$  and a  $k$ -generated divergence  $\Delta'$ . For any  $k$ -cut  $\overline{\Delta}^k$  of  $\Delta$ ,*

$$\Delta' \leq \Delta \implies \Delta' \leq \overline{\Delta}^k.$$

*Also, if  $\Delta$  has the data-processing inequality, the  $k$ -cut is the greatest  $k$ -generated divergence below  $\Delta$ :*

$$\Delta' \leq \Delta \iff \Delta' \leq \overline{\Delta}^k \leq \Delta.$$

*Proof.* Since  $\Delta'$  is  $k$ -generated, for any choice of  $Y$  with  $|Y| = k$ , we have

$$\Delta' \leq \Delta \implies \Delta'_Y \leq \Delta_Y \implies \overline{\Delta'}^k \leq \overline{\Delta}^k \iff \Delta' \leq \overline{\Delta}^k.$$

The second statement is proved as follows: From the first statement of this lemma and Lemma 3 (Lemma 10 in the paper), We have

$$\Delta' \leq \Delta \implies \Delta' \leq \overline{\Delta}^k \leq \Delta$$

The converse direction is obvious.  $\square$

**An extended version.** We can extend this theorem to more suitable for conversion laws of differential privacy.

**Lemma 10** (Lemma 15, extended). *Consider a divergence  $\Delta$  satisfying data-processing inequality and a  $k$ -generated divergence  $\Delta'$ .*

$$\begin{aligned} \forall X. \forall \mu_1, \mu_2 \in \text{Prob}(X). (\Delta_X(\mu_1 || \mu_2) \leq \delta \implies \Delta'_X(\mu_1 || \mu_2) \leq \rho) \\ \iff \forall X. \forall \mu_1, \mu_2 \in \text{Prob}(X). (\overline{\Delta}_X^k(\mu_1 || \mu_2) \leq \delta \implies \Delta'_X(\mu_1 || \mu_2) \leq \rho) \end{aligned}$$

*Proof.* ( $\iff$ ) Obvious from Lemma 3 (Lemma 10 in the paper). ( $\implies$ ) From the assumption, we obtain

$$\begin{aligned} \forall X. \forall \mu_1, \mu_2 \in \text{Prob}(X). \forall \gamma: X \rightarrow \text{Prob}(Y). \\ \Delta_Y(\gamma(\mu_1) || \gamma(\mu_2)) \leq \delta \implies \Delta'_Y(\gamma(\mu_1) || \gamma(\mu_2)) \leq \rho. \end{aligned}$$

This implies

$$\forall X. \forall \mu_1, \mu_2 \in \text{Prob}(X). (\overline{\Delta}_X^k(\mu_1 || \mu_2) \leq \delta \implies \overline{\Delta'}_X^k(\mu_1 || \mu_2) \leq \rho)$$

Thanks to the  $k$ -generatedness of  $\Delta'$ , we conclude the statement of this lemma.  $\square$

## B.7 Proof of 2-generatedness of $\varepsilon$ -divergence

**Theorem 11.** *The  $\varepsilon$ -divergence  $\Delta^\varepsilon$  is 2-generated for all  $\varepsilon$ .*

*Proof.* We recall that the  $\varepsilon$ -divergence  $\Delta^\varepsilon$  is quasi-convex (moreover, jointly convex) and satisfies data-processing inequality. We choose a set  $Y = \{\text{Acc}, \text{Rej}\}$ , and take the 2-cut of  $\Delta^\varepsilon$  by

$$\overline{\Delta}^2_{\varepsilon, X}(\mu_1 || \mu_2) = \sup_{\gamma: X \rightarrow \text{Prob}(\{\text{Acc}, \text{Rej}\})} \Delta^\varepsilon_Y(\gamma(\mu_1) || \gamma(\mu_2))$$

We show this is equal to the original  $\Delta_X^\varepsilon(\mu_1||\mu_2)$ . Without loss of generality we may assume  $X$  is at most countable. If  $X$  is an arbitrary set, we can restrict it to countable set in a similar way as the proof of Lemma 7 (Lemma 14(3) in the paper).

By the weak Birkhoff-von Neumann Theorem (Theorem 1 in the appendix), each  $\gamma: X \rightarrow \text{Prob}(\{\text{Acc}, \text{Rej}\})$  can be decomposed into a convex combination  $\gamma(x) = \sum_{i \in I} \alpha_i \mathbf{d}_{\gamma_i(x)}$  of functions  $\gamma_i: X \rightarrow \{\text{Acc}, \text{Rej}\}$  ( $i \in I$ ) where  $I$  is a countable set and  $\sum_{i \in I} \alpha_i = 1$ . By combining this and quasi-convexity and data-processing inequality of  $\Delta^\varepsilon$ , we obtain

$$\begin{aligned} \Delta^\varepsilon(\gamma(\mu_1)||\gamma(\mu_2)) &= \Delta^\varepsilon(\sum_{i \in I} \alpha_i \gamma_i(\mu_1)||\sum_{i \in I} \alpha_i \gamma_i(\mu_2)) \\ &= \sup_{i \in I} \Delta^\varepsilon(\gamma_i(\mu_1)||\gamma_i(\mu_2)) \\ &\leq \sup_{\gamma: X \rightarrow \{\text{Acc}, \text{Rej}\}} \Delta_X^\varepsilon(\gamma(\mu_1)||\gamma(\mu_2)). \end{aligned}$$

This implies

$$\begin{aligned} \overline{\Delta_X^\varepsilon}^2(\mu_1||\mu_2) &= \sup_{\gamma: X \rightarrow \text{Prob}(\{\text{Acc}, \text{Rej}\})} \Delta^\varepsilon(\gamma(\mu_1)||\gamma(\mu_2)) \\ &= \sup_{\gamma: X \rightarrow \{\text{Acc}, \text{Rej}\}} \Delta_{\{\text{Acc}, \text{Rej}\}}^\varepsilon(\gamma(\mu_1)||\gamma(\mu_2)) \\ &= \sup_{\gamma: X \rightarrow \{\text{Acc}, \text{Rej}\}} \sup_{A \subseteq \{\text{Acc}, \text{Rej}\}} (\Pr[\gamma(\mu_1) \in A] - e^\varepsilon \Pr[\gamma(\mu_2) \in A]) \\ &= \sup_{\gamma: X \rightarrow \{\text{Acc}, \text{Rej}\}} \sup_{A \subseteq \{\text{Acc}, \text{Rej}\}} (\Pr[\mu_1 \in \gamma^{-1}(A)] - e^\varepsilon \Pr[\mu_2 \in \gamma^{-1}(A)]) \\ &\stackrel{(*)}{=} \sup_{S \subseteq X} (\Pr[\mu_1 \in S] - e^\varepsilon \Pr[\mu_2 \in S]) \\ &= \Delta_X^\varepsilon(\mu_1||\mu_2) \end{aligned}$$

We have the 2-generatedness:  $\overline{\Delta_X^\varepsilon}^2 = \Delta^\varepsilon$ . The equality (\*) is proved as follows: for given  $\gamma$  and  $A$ , we take  $S = \gamma^{-1}(A)$ . Conversely, for any  $S \subseteq X$  we take  $A = \{\text{Acc}\}$  and  $\gamma = \chi_S$ , which is the indicator function of  $S$  defined by  $\chi_S(x) = 1$  if  $x \in S$  and  $\chi_S(x) = 0$  otherwise.  $\square$

**General version** We can extend this result to general measurable setting by using the continuity of  $\Delta^\varepsilon$  (see also [Liese and Vajda, 2006]), which is obtained by  $f$ -divergence characterization of  $\Delta^\varepsilon$  [Barthe and Olmedo, 2013]. For general measurable space  $X$  and every pair  $\mu_1, \mu_2 \in \text{Prob}(X)$  we have

$$\begin{aligned} \Delta_X^\varepsilon(\mu_1||\mu_2) &= \sup_{\gamma: X \rightarrow \mathbb{N}} \Delta_{\mathbb{N}}^\varepsilon(\gamma(\mu_1)||\gamma(\mu_2)) \\ &= \sup_{\gamma: X \rightarrow \mathbb{N}} \sup_{\gamma': \mathbb{N} \rightarrow \text{Prob}(\{\text{Acc}, \text{Rej}\})} \Delta_{\{\text{Acc}, \text{Rej}\}}^\varepsilon((\gamma' \bullet \gamma)(\mu_1)||(\gamma' \bullet \gamma)(\mu_2)) \\ &= \sup_{\gamma: X \rightarrow \{\text{Acc}, \text{Rej}\}} \Delta_{\{\text{Acc}, \text{Rej}\}}^\varepsilon(\gamma(\mu_1)||\gamma(\mu_2)) \end{aligned}$$

Functions are assumed to be measurable.



## B.8 Counterexample: Rényi-divergence is not 2-generated

**Theorem 12.** *There are  $\mu_1, \mu_2 \in \text{Prob}(\{a, b, c\})$  such that*

$$\overline{D}_{\{a,b,c\}}^{\alpha^2}(\mu_1||\mu_2) < D_{\{a,b,c\}}^{\alpha}(\mu_1||\mu_2)$$

*Proof.* Let  $p = (1/2)^{\beta/(\alpha-1)}$  and  $\alpha + 1 < \beta$  and define

$$\begin{aligned}\mu_1 &= \frac{1}{3}\mathbf{d}_a + \frac{1}{3}\mathbf{d}_b + \frac{1}{3}\mathbf{d}_c, \\ \mu_2 &= \frac{p^2}{p^2+p+1}\mathbf{d}_a + \frac{p}{p^2+p+1}\mathbf{d}_b + \frac{1}{p^2+p+1}\mathbf{d}_c\end{aligned}$$

Since Rényi divergence is quasi-convex and satisfies data-processing inequality, it suffices to show the proper inequality  $D_{\{\text{Acc}, \text{Rej}\}}^{\alpha}(\gamma(\mu_1)||\gamma(\mu_2)) < D_{\{a,b,c\}}^{\alpha}(\mu_1||\mu_2)$  holds for any *deterministic decision rule*  $\gamma: \{a, b, c\} \rightarrow \{\text{Acc}, \text{Rej}\}$ . There are 8 cases of  $\gamma: \{a, b, c\} \rightarrow \{\text{Acc}, \text{Rej}\}$ , but thanks to the data-processing inequality and reflexivity of Rényi divergence, it suffices to consider 3 cases:  $(\gamma(a), \gamma(b), \gamma(c)) = (\text{Acc}, \text{Acc}, \text{Rej}), (\text{Acc}, \text{Rej}, \text{Acc}), (\text{Rej}, \text{Acc}, \text{Acc})$ . Hence,

$$\begin{aligned}& \frac{\exp((\alpha-1)D_{\{a,b,c\}}^{\alpha}(\mu_1||\mu_2))}{\exp((\alpha-1)D_{\{\text{Acc}, \text{Rej}\}}^{\alpha}(\gamma(\mu_1)||\gamma(\mu_2)))} \\ & \geq \min\left(\frac{p^{2(1-\alpha)} + p^{1-\alpha} + 1}{2^{\alpha}(p^2+p)^{1-\alpha} + 1}, \frac{p^{2(1-\alpha)} + p^{1-\alpha} + 1}{2^{\alpha}(p^2+1)^{1-\alpha} + p^{1-\alpha}}, \frac{p^{2(1-\alpha)} + p^{1-\alpha} + 1}{2^{\alpha}(p+1)^{1-\alpha} + p^{2(1-\alpha)}}\right) \\ & \geq \min\left(\frac{2^{\beta} + 2^{-\beta} + 1}{2^{\alpha}(p+1)^{1-\alpha} + 2^{-\beta}}, \frac{2^{\beta} + 2^{-\beta} + 1}{2^{\alpha-\beta}(p^2+1)^{1-\alpha} + 1}, \frac{2^{\beta} + 2^{-\beta} + 1}{2^{\beta} + 2^{\alpha-\beta}(p+1)^{1-\alpha}}\right) \\ & \geq \min\left(\frac{2^{\beta} + 2^{-\beta} + 1}{2^{\alpha+1}}, \frac{2^{\beta} + 2^{-\beta} + 1}{2^{\beta} + 1}\right) > 1.\end{aligned}$$

Hence,

$$\begin{aligned}D_{\{\text{Acc}, \text{Rej}\}}^{\alpha}(\gamma(\mu_1)||\gamma(\mu_2)) + \frac{1}{\alpha-1} \log \min\left(\frac{2^{\beta} + 2^{-\beta} + 1}{2^{\alpha+1}}, \frac{2^{\beta} + 2^{-\beta} + 1}{2^{\beta} + 1}\right) \\ \leq D_{\{a,b,c\}}^{\alpha}(\mu_1||\mu_2).\end{aligned}$$

holds for any  $\gamma: \{a, b, c\} \rightarrow \{\text{Acc}, \text{Rej}\}$ . By the data-processing inequality of Rényi divergence, this discussion does not depend on the choice of  $\{\text{Acc}, \text{Rej}\}$ . By weak Birkhoff-von Neumann theorem, and the quasi-convexity Rényi divergence, we conclude

$$\overline{D}_X^{\alpha^2}(\mu_1||\mu_2) + \frac{1}{\alpha-1} \log \min\left(\frac{2^{\beta} + 2^{-\beta} + 1}{2^{\alpha+1}}, \frac{2^{\beta} + 2^{-\beta} + 1}{2^{\beta} + 1}\right) \leq D_X^{\alpha}(\mu_1||\mu_2).$$

□

## B.9 Proof of $\infty$ -generatedness of Rényi-divergence

$f$ -divergences is a class of divergences that are characterized by convex functions. For a given convex function  $f: [0, \infty) \rightarrow \mathbb{R}$  satisfying  $\lim_{t \rightarrow 0^+} tf(0/t) = 0$  (this

function is called weight function), we define an  $f$ -divergence  $\Delta^f$  corresponding the function  $f$ ,

$$\Delta_X^f(\mu_1||\mu_2) \stackrel{\text{def}}{=} \sum_{x \in X} \mu_2(x) f\left(\frac{\mu_1(x)}{\mu_2(x)}\right).$$

The  $\alpha$ -Rényi divergence  $D^\alpha$  can also be characterized using  $f$ -divergence as follows:

$$D^\alpha(\mu_1||\mu_2) = \frac{1}{\alpha - 1} \log \sum_{x \in X} \mu_2(x) \left(\frac{\mu_1(x)}{\mu_2(x)}\right)^\alpha = \frac{1}{\alpha - 1} \log \Delta_X^{t \mapsto t^\alpha}(\mu_1||\mu_2).$$

Remark that every  $f$ -divergence is quasi-convex (moreover jointly convex) and continuous, and satisfies data-processing inequality (see also [Liese and Vajda, 2006, Theorems 14–16]).

Since the mapping  $t \mapsto \frac{1}{\alpha-1} \log t$  is monotone, every  $\alpha$ -Rényi divergence  $D^\alpha$  is also quasi-convex and satisfies data-processing inequality. Thanks to the data-processing inequality, every  $\alpha$ -Rényi divergence  $D^\alpha$  is at least  $\infty$ -generated. We need to prove that for every finite  $k$ , every  $\alpha$ -Rényi divergence  $D^\alpha$  is not  $k$ -generated. To prove this, we use that the mapping  $t \mapsto t^\alpha$  is strictly convex.

**Lemma 13.** *If a weight function is strictly convex, its  $f$ -divergence  $\Delta^f$  is not  $k$ -generated for every finite  $k$ .*

*Proof.* Without loss of generality, we may assume  $k > 1$ .

Consider a pair  $\mu_1, \mu_2 \in \text{Prob}(\{0, 1, 2, \dots, k\})$  satisfying  $\text{supp}(\mu_1) = \text{supp}(\mu_2) = \{0, 1, 2, \dots, k\}$  and  $\mu_1(i)/\mu_2(i) \neq \mu_1(j)/\mu_2(j)$  where  $1 \leq i, j \leq k+1$  and  $i \neq j$ . We can give such distributions. Then we obtain,

$$\begin{aligned} & \overline{\Delta^f}_{\{0,1,2,\dots,k\}}^k(\mu_1||\mu_2) \\ &= \sup_{\gamma: \{0,1,2,\dots,k\} \rightarrow \text{Prob}(\{0,1,2,\dots,k-1\})} \Delta_{\{0,1,2,\dots,k-1\}}^f(\gamma(\mu_1)||\gamma(\mu_2)) \\ & \quad \{\text{Weak Birkhoff-von Neumann theorem and the joint convexity of } \Delta^f\} \\ &= \max_{\gamma: \{0,1,2,\dots,k\} \rightarrow \{0,1,2,\dots,k-1\}} \Delta^f(\gamma(\mu_1)||\gamma(\mu_2)) \\ &= \max_{\gamma: \{0,1,2,\dots,k\} \rightarrow \{0,1,2,\dots,k-1\}} \sum_{j=0}^{k-1} f\left(\frac{\sum_{\gamma(i)=j} \mu_1(i)}{\sum_{\gamma(i)=j} \mu_2(i)}\right) (\sum_{\gamma(i)=j} \mu_2(i)) \\ & \quad \{\text{Jensen's inequality with the strict convexity of the weight function } f\} \\ &< \sum_{i=0}^k f\left(\frac{\mu_1(i)}{\mu_2(i)}\right) \mu_2(i) = \Delta^f(\mu_1||\mu_2). \end{aligned}$$

Since  $k+1 > k$ , by Dirichlet's pigeonhole principle, for any  $\gamma: \{0, 1, 2, \dots, k\} \rightarrow \{0, 1, 2, \dots, k-1\}$ , for some  $j \in \{0, 1, 2, \dots, k\}$ , there are at least two different  $i_1, i_2 \in \{0, 1, 2, \dots, k-1\}$  such that  $\gamma(i_1) = j$  and  $\gamma(i_2) = j$ . From the assumption on  $\mu_1$  and  $\mu_2$ , we have  $(\mu_1(i_1)/\mu_2(i_1)) \neq (\mu_1(i_2)/\mu_2(i_2))$ . Since the function  $f$  is strictly convex, by the condition for equality of Jensen's inequality, we have the strict inequality

$$f\left(\frac{\mu_1(i_1) + \mu_1(i_2)}{\mu_2(i_1) + \mu_2(i_2)}\right) (\mu_2(i_1) + \mu_2(i_2)) < f\left(\frac{\mu_1(i_1)}{\mu_2(i_1)}\right) \mu_2(i_1) + f\left(\frac{\mu_1(i_2)}{\mu_2(i_2)}\right) \mu_2(i_2).$$

Therefore, for any  $\gamma: \{0, 1, 2, \dots, k\} \rightarrow \{0, 1, 2, \dots, k-1\}$ , we have

$$\sum_{j=1}^k \left( \frac{\sum_{\gamma(i)=j} \mu_1(i)}{\sum_{\gamma(i)=j} \mu_2(i)} \right)^\alpha (\sum_{\gamma(i)=j} \mu_2(i)) < \sum_{i=1}^{k+1} \left( \frac{\mu_1(i)}{\mu_2(i)} \right)^\alpha \mu_2(i).$$

Since there only finite case of  $\gamma: \{0, 1, 2, \dots, k\} \rightarrow \{0, 1, 2, \dots, k-1\}$ , we conclude  $\overline{\Delta}^f_{\{0,1,2,\dots,k\}}(\mu_1||\mu_2) < \Delta^f_{\{0,1,2,\dots,k\}}(\mu_1||\mu_2)$ . Since every  $f$ -divergence satisfies data-processing inequality, this discussion does not depend on the choice of set  $Y$  with  $|Y| = k$  in the construction of the  $k$ -cut  $\overline{\Delta}^f$ . Thus,  $\Delta^f$  is not  $k$ -generated for any finite  $k$ .  $\square$

Since the mapping  $t \mapsto \frac{1}{\alpha-1} \log t$  is strict, we conclude,

**Corollary 14.** *For any alpha > 1, the  $\alpha$ -Rényi divergence  $D^\alpha$  is not  $k$ -generated for every finite  $k$ .*

## B.10 Proof of Theorem 18

**Theorem 15** (Theorem 18). *Let  $\mu_1, \mu_2 \in \text{Prob}(X)$ .  $\overline{\Delta}_X^2(\mu_1||\mu_2) \leq \rho$  holds if and only if for any  $\gamma: X \rightarrow \text{Prob}(\{\text{Acc}, \text{Rej}\})$ ,*

$$(\Pr[\gamma(\mu_1) = \text{Rej}], \Pr[\gamma(\mu_2) = \text{Acc}]) \in R^\Delta(\rho).$$

*Proof.* We fix a 2-cut  $\overline{\Delta}^2$  of a divergence  $\Delta$ . Suppose that it is defined with a set  $W$  satisfying  $|W| = 2$ .

$$\overline{\Delta}_X^2(\mu_1||\mu_2) = \sup_{\gamma: X \rightarrow \text{Prob}(W)} \Delta_W(\gamma(\mu_1)||\gamma(\mu_2)).$$

We recall the definition of privacy region

$$R^\Delta(\rho) = \left\{ (x, y) \mid \overline{\Delta}_{\{\text{Acc}, \text{Rej}\}}^2((1-x)\mathbf{d}_{\text{Acc}} + x\mathbf{d}_{\text{Rej}}||y\mathbf{d}_{\text{Acc}} + (1-y)\mathbf{d}_{\text{Rej}}) \leq \rho \right\}.$$

Since every probability distribution  $\nu \in \text{Prob}(\{\text{Acc}, \text{Rej}\})$  can be rewritten as  $\nu = \Pr[\nu = \text{Acc}]\mathbf{d}_{\text{Acc}} + \Pr[\nu = \text{Rej}]\mathbf{d}_{\text{Rej}}$ , we obtain

$$\begin{aligned} \overline{\Delta}_{\{\text{Acc}, \text{Rej}\}}^2(\gamma(\mu_1)||\gamma(\mu_2)) &\leq \rho \\ \iff (\Pr[\gamma(\mu_1) = \text{Rej}], \Pr[\gamma(\mu_2) = \text{Acc}]) &\in R^\Delta(\rho). \end{aligned}$$

Hence, it suffices to show

$$\begin{aligned} (\overline{\Delta}_X^2(\mu_1||\mu_2) \leq \rho) \\ \iff \forall \gamma: X \rightarrow \text{Prob}(\{\text{Acc}, \text{Rej}\}). (\overline{\Delta}_{\{\text{Acc}, \text{Rej}\}}^2(\gamma(\mu_1)||\gamma(\mu_2)) \leq \rho) \end{aligned}$$

( $\implies$ ) Obvious by the data-processing inequality of the 2-cut  $\overline{\Delta}^2$ .  
( $\impliedby$ ) The assumption is equivalent to

$$\begin{aligned} \forall \gamma: X \rightarrow \text{Prob}(\{\text{Acc}, \text{Rej}\}). \forall \gamma': \{\text{Acc}, \text{Rej}\} \rightarrow \text{Prob}(W). \\ (\Delta_W(\gamma'(\gamma(\mu_1))||\gamma'(\gamma(\mu_2))) \leq \rho) \end{aligned}$$

Since  $|W| = |\{\text{Acc}, \text{Rej}\}| = 2$ , this is equivalent to

$$\gamma'': X \rightarrow \text{Prob}(W). \Delta_W(\gamma''(\mu_1) || \gamma''(\mu_2)) \leq \rho.$$

For any  $\gamma: X \rightarrow \text{Prob}(\{\text{Acc}, \text{Rej}\})$ . and  $\gamma': \{\text{Acc}, \text{Rej}\} \rightarrow \text{Prob}(W)$ . we take  $\gamma'' = \gamma' \bullet \gamma$ . Conversely for any  $\gamma'': X \rightarrow \text{Prob}(W)$  we take  $\gamma = f \bullet \gamma''$  and  $\gamma' = f^{-1}$  where  $f: \{\text{Acc}, \text{Rej}\} \rightarrow W$  is a bijection.  $\square$

## B.11 Detailed Proof of Theorem 20

**Theorem 16** (Theorem 20). *If a mechanism  $M$  is  $(\alpha, \rho)$ -RDP then it is  $(\rho + \log((\alpha - 1)/\alpha) - (\log \delta + \log \alpha)/(\alpha - 1), \delta)$ -DP for any  $0 < \delta < 1$ .*

*Proof.* The privacy region of Rényi divergence is given by

$$R^{D^\alpha}(\rho) = \left\{ (x, y) \mid x^\alpha(1-y)^{1-\alpha} + (1-x)^\alpha y^{1-\alpha} \leq e^{\rho(\alpha-1)} \right\}.$$

Here we assume  $0^{1-\alpha} = 0$ .

By Lemma 10 (an extension of Lemma 15 in the paper), to find  $\varepsilon$  satisfying

$$\forall X. \forall \mu_1, \mu_2 \in \text{Prob}(X). D_X^\alpha(\mu_1 || \mu_2) \leq \rho \implies \Delta_X^\varepsilon(\mu_1 || \mu_2) \leq \delta,$$

it is necessary and sufficient to find  $\varepsilon$  satisfying

$$\forall X. \forall \mu_1, \mu_2 \in \text{Prob}(X). \overline{D}_X^{\alpha^2}(\mu_1 || \mu_2) \leq \rho \implies \Delta_X^\varepsilon(\mu_1 || \mu_2) \leq \delta.$$

By Theorem 14 (Theorem 18 in the paper), this is equivalent to find  $\varepsilon$  satisfying  $R^{D^\alpha}(\rho) \subseteq R^{\Delta^\varepsilon}(\delta)$ . Inspired from Mironov's proof of conversion law from RDP to DP [Mironov, 2017, Proposition 3]: we obtain,

$$\begin{aligned} & x^\alpha(1-y)^{1-\alpha} + (1-x)^\alpha y^{1-\alpha} \leq e^{\rho(\alpha-1)} \\ \implies & (1-x)^\alpha y^{1-\alpha} \leq e^{\rho(\alpha-1)} \\ \implies & (1-x) \leq (e^\rho y)^{\frac{\alpha-1}{\alpha}} \tag{\dagger} \\ \implies & (e^\rho y > \delta^{\frac{\alpha}{\alpha-1}} \implies (1-x) \leq e^{\rho - \log d/(\alpha-1)} y) \\ & \wedge (e^\rho y \leq \delta^{\frac{\alpha}{\alpha-1}} \implies (1-x) \leq \delta) \\ \implies & (1-x) \leq e^{\rho - \log d/(\alpha-1)} y + \delta. \end{aligned}$$

The last part of  $(1-x) \leq e^{\rho - \log d/(\alpha-1)} y + \delta$  derives Mironov's result [Mironov, 2017, Proposition 3]. Now, starting from (\dagger), we have a better bound for DP as follows: consider a curve  $C$  given by the equation

$$1-x = (e^\rho y)^{\frac{\alpha-1}{\alpha}} \iff x = 1 - (e^\rho y)^{\frac{\alpha-1}{\alpha}}$$

. We have the derivative of  $x$  as follows:

$$\frac{dx}{dy} = -\frac{\alpha-1}{\alpha} e^{\frac{\alpha-1}{\alpha}\rho} y^{-\frac{1}{\alpha}}$$

We can take the tangent of the curve  $C$  by

$$x = \frac{dx}{dy}(t)(y-t) + (e^\rho(1-t))^{\frac{\alpha-1}{\alpha}}$$

We will find parameters that a tangent of  $C$  meets  $(1-x) = e^\varepsilon y + \delta$ .  $x = -e^\varepsilon y - \delta + 1$  We first solve

$$-e^\varepsilon = \frac{dx}{dy}(t) = -\frac{\alpha-1}{\alpha} e^{\frac{\alpha-1}{\alpha}\rho} t^{-\frac{1}{\alpha}} \iff \varepsilon = \log\left(\frac{\alpha-1}{\alpha}\right) + \frac{\alpha-1}{\alpha}\rho - \frac{1}{\alpha}\log t.$$

Next we solve

$$1-\delta = -t \frac{dx}{dy}(t) + 1 - (e^\rho t)^{\frac{\alpha-1}{\alpha}} \iff 1-\delta = \frac{\alpha-1}{\alpha} e^{\frac{\alpha-1}{\alpha}\rho} t^{-\frac{1}{\alpha}} t + 1 - (e^\rho t)^{\frac{\alpha-1}{\alpha}}$$

We then have

$$\delta = (e^\rho t)^{\frac{\alpha-1}{\alpha}} - \frac{\alpha-1}{\alpha} e^{\frac{\alpha-1}{\alpha}\rho} t^{-\frac{1}{\alpha}} t = \frac{1}{\alpha} (e^\rho t)^{\frac{\alpha-1}{\alpha}} \iff t = (\delta \alpha e^{-\frac{\alpha-1}{\alpha}\rho})^{\frac{\alpha}{\alpha-1}}$$

Simple computations give the following:

$$\varepsilon = \log\left(\frac{\alpha-1}{\alpha}\right) + \rho - \frac{\log \delta + \log \alpha}{\alpha-1}.$$

By the symmetry of  $R^{D^\alpha}(\rho)$  and  $R^{\Delta^\varepsilon}(\delta)$ , we have

$$R^{D^\alpha}(\rho) \subseteq R^{\Delta^\varepsilon}(\delta).$$

As we mentioned, it is equivalent to

$$\forall X. \forall \mu_1, \mu_2 \in \text{Prob}(X). D_X^\alpha(\mu_1 || \mu_2) \leq \rho \implies \Delta_X^\varepsilon(\mu_1 || \mu_2) \leq \delta.$$

This completes the proof.  $\square$

As a conjecture, if we calculate tangents of the boundary of the privacy region  $R^{D^\alpha}(\rho)$ , we have *optimal* conversion law from  $(\alpha, \rho)$ -RDP to DP. The boundary of  $R^{D^\alpha}(\rho)$  is given by the equation

$$x^\alpha(1-y)^{1-\alpha} + (1-x)^\alpha y^{1-\alpha} = e^{\rho(\alpha-1)}.$$

## B.12 Proof of Theorem 22

**Theorem 17** (Theorem 22). *Let  $F: [0, 1]^{2k} \rightarrow [0, \infty]$  be a quasi-convex function. Then the divergence  $\Delta^F$  defined below is  $k$ -generated and quasi-convex.*

$$\Delta_X^F(\mu_1 || \mu_2) \stackrel{\text{def}}{=} \sup_{\substack{\{A_i\}_{i=1}^k \\ \text{partition of } X}} F(\mu_1(A_1), \dots, \mu_1(A_k), \mu_2(A_1), \dots, \mu_2(A_k)).$$

*Proof.* The quasi-convexity is obvious from the quasi-convexity of  $F: [0, 1]^{2k} \rightarrow [0, \infty]$ . We show the  $k$ -generatedness. We take the  $k$ -cut with respect to the  $k$ -element set  $\{1, 2, \dots, k\}$ . We may assume  $X$  is countable. For any

$\mu_1, \mu_2 \in \text{Prob}(X)$ ,

$$\begin{aligned}
& \overline{\Delta^F}_X^k(\mu_1 || \mu_2) \\
&= \sup_{\gamma: X \rightarrow \text{Prob}(\{1,2,\dots,k\})} \Delta_{\{1,2,\dots,k\}}^F(\gamma(\mu_1) || \gamma(\mu_2)) \\
&= \sup_{\gamma: X \rightarrow \text{Prob}(\{1,2,\dots,k\})} \sup_{\substack{\{A_i\}_{i=1}^k \\ \text{partition of} \\ \{1,2,\dots,k\}}} F \left( \begin{array}{c} (\gamma(\mu_1))(A_1), \dots, (\gamma(\mu_1))(A_k), \\ (\gamma(\mu_2))(A_1), \dots, (\gamma(\mu_2))(A_k) \end{array} \right) \\
&= \sup_{\substack{\gamma: X \rightarrow \text{Prob}(\{1,2,\dots,k\}) \\ p: \{1,2,\dots,k\} \rightarrow \{1,2,\dots,k\}}} F \left( \begin{array}{c} (\gamma(\mu_1))(p^{-1}(1)), \dots, (\gamma(\mu_1))(p^{-1}(k)), \\ (\gamma(\mu_2))(p^{-1}(1)), \dots, (\gamma(\mu_2))(p^{-1}(k)) \end{array} \right) \\
&= \sup_{\substack{\gamma: X \rightarrow \text{Prob}(\{1,2,\dots,k\}) \\ p: \{1,2,\dots,k\} \rightarrow \{1,2,\dots,k\}}} F \left( \begin{array}{c} ((p \bullet \gamma)(\mu_1))(1), \dots, ((p \bullet \gamma)(\mu_1))(k), \\ ((p \bullet \gamma)(\mu_2))(1), \dots, ((p \bullet \gamma)(\mu_2))(k) \end{array} \right) \\
&= \sup_{\gamma: X \rightarrow \text{Prob}(\{1,2,\dots,k\})} F \left( \begin{array}{c} ((\gamma(\mu_1))(1), \dots, (\gamma(\mu_1))(k)), \\ (\gamma(\mu_2))(1), \dots, (\gamma(\mu_2))(k) \end{array} \right).
\end{aligned}$$

Here by weak Birkhoff-von Neumann theorem (countable version), every function  $\gamma: X \rightarrow \text{Prob}(\{1, 2, \dots, k\})$  is decomposed into a (countable) convex combination  $\sum_{i \in I} a_i (\eta_{\{1,2,\dots,k\}} \circ \gamma_i)$  of  $\gamma_i: X \rightarrow \{1, 2, \dots, k\}$ . Hence,

$$\begin{aligned}
& \overline{\Delta^F}_X^k(\mu_1 || \mu_2) \\
&= \sup_{\gamma: X \rightarrow \text{Prob}(\{1,2,\dots,k\})} F \left( \begin{array}{c} ((\gamma(\mu_1))(1), \dots, (\gamma(\mu_1))(k)), \\ (\gamma(\mu_2))(1), \dots, (\gamma(\mu_2))(k) \end{array} \right) \quad (\dagger) \\
&= \sup_{\gamma: X \rightarrow \text{Prob}(\{1,2,\dots,k\})} F \left( \begin{array}{c} ((\sum_{i \in I} a_i (\eta_{\{1,2,\dots,k\}} \circ \gamma_i)(\mu_1))(1), \\ \dots, (\sum_{i \in I} a_i (\eta_{\{1,2,\dots,k\}} \circ \gamma_i)(\mu_1))(k)), \\ (\sum_{i \in I} a_i (\eta_{\{1,2,\dots,k\}} \circ \gamma_i)(\mu_2))(1), \\ \dots, (\sum_{i \in I} a_i (\eta_{\{1,2,\dots,k\}} \circ \gamma_i)(\mu_2))(k) \end{array} \right) \\
&= \sup_{\gamma: X \rightarrow \text{Prob}(\{1,2,\dots,k\})} F \left( \begin{array}{c} (\sum_{i \in I} a_i (\gamma_i(\mu_1))(1), \dots, \sum_{i \in I} a_i (\gamma_i(\mu_1))(k)), \\ (\sum_{i \in I} a_i (\gamma_i(\mu_2))(1), \dots, \sum_{i \in I} a_i (\gamma_i(\mu_2))(k)) \end{array} \right) \\
&\leq \sup_{\gamma: X \rightarrow \text{Prob}(\{1,2,\dots,k\})} \sup_{i \in I} F \left( \begin{array}{c} ((\gamma_i(\mu_1))(1), \dots, (\gamma_i(\mu_1))(k)), \\ (\gamma_i(\mu_2))(1), \dots, (\gamma_i(\mu_2))(k) \end{array} \right) \\
&\leq \sup_{\gamma: X \rightarrow \{1,2,\dots,k\}} F \left( \begin{array}{c} ((\gamma(\mu_1))(1), \dots, (\gamma(\mu_1))(k)), \\ (\gamma(\mu_2))(1), \dots, (\gamma(\mu_2))(k) \end{array} \right) \\
&= \sup_{\gamma: X \rightarrow \{1,2,\dots,k\}} F \left( \begin{array}{c} (\mu_1(\gamma^{-1}(1)), \dots, \mu_1(\gamma^{-1}(k))), \\ (\mu_2(\gamma^{-1}(1)), \dots, \mu_2(\gamma^{-1}(k))) \end{array} \right) \\
&\leq \sup_{\substack{\{A_i\}_{i=1}^k \\ \text{partition of} \\ \{1,2,\dots,k\}}} F \left( \begin{array}{c} (\gamma(\mu_1))(A_1), \dots, (\gamma(\mu_1))(A_k), \\ (\gamma(\mu_2))(A_1), \dots, (\gamma(\mu_2))(A_k) \end{array} \right) \\
&= \Delta_X^F(\mu_1 || \mu_2).
\end{aligned}$$

We have  $\overline{\Delta^F}_X^k(\mu_1 || \mu_2) \leq \Delta_X^F(\mu_1 || \mu_2)$ . Conversely, by equality  $(\dagger)$ , we also have  $\overline{\Delta^F}_X^k(\mu_1 || \mu_2) \geq \Delta_X^F(\mu_1 || \mu_2)$ . This completes the proof.  $\square$

**General version** If the quasi-convex function  $F: [0, 1]^{2k} \rightarrow [0, \infty]$  is also continuous, we can extend Theorem 22 to general measurable setting.

**Theorem 18** (*k-generatedness in general setting*). *Assume that  $F: [0, 1]^{2k} \rightarrow [0, \infty]$  is quasi-convex and continuous. For any measurable space  $X$ , we have*

$$\Delta_X(\mu_1, \mu_2) = \sup_{\substack{\gamma: X \rightarrow \text{Prob}(\{1, 2, \dots, k\}) \\ \text{measurable function}}} \Delta_X(\gamma(\mu_1), \gamma(\mu_2)).$$

*Proof.* We easily calculate as follows (functions are assumed to be measurable):

$$\begin{aligned} & \Delta_X(\mu_1, \mu_2) \\ &= \sup \{ F(\mu_1(A_1), \dots, \mu_1(A_k), \mu_2(A_1), \dots, \mu_2(A_k)) \mid \{A_i\}_{i=1}^k: \text{m'ble partition of } X \} \\ &= \sup \{ F(\mu_1(f^{-1}(1)), \dots, \mu_1(f^{-1}(k)), \mu_2(f^{-1}(1)), \dots, \mu_2(f^{-1}(k))) \mid f: X \rightarrow \{1, 2, \dots, k\} \} \\ &= \sup \{ F((f(\mu_1))(1), \dots, (f(\mu_1))(k), (f(\mu_2))(1), \dots, (f(\mu_2))(k)) \mid f: X \rightarrow \{1, 2, \dots, k\} \} \\ &\leq \sup \{ F((\gamma(\mu_1))(1), \dots, (\gamma(\mu_1))(k), (\gamma(\mu_2))(1), \dots, (\gamma(\mu_2))(k)) \mid \gamma: X \rightarrow \text{Prob}(\{1, 2, \dots, k\}) \} \\ &\leq \sup \left\{ F \left( \begin{array}{c} (\gamma(\mu_1))(A_1), \dots, (\gamma(\mu_1))(A_k), \\ (\gamma(\mu_2))(A_1), \dots, (\gamma(\mu_2))(A_k) \end{array} \right) \mid \begin{array}{l} \gamma: X \rightarrow \text{Prob}(\{1, 2, \dots, k\}), \\ \{A_i\}_{i=1}^k: \text{m'ble partition of } X \end{array} \right\} \\ &= \sup_{\gamma: X \rightarrow \text{Prob}(\{1, 2, \dots, k\})} \Delta_{\{1, 2, \dots, k\}}(\gamma(\mu_1), \gamma(\mu_2)) \end{aligned}$$

Note that we treat  $\{1, 2, \dots, k\}$  as a finite discrete space. Consider the family  $\{J_n\}_{n=1}^\infty$  of finite sets (discrete spaces) defined as follows:

$$J_n = \{ (j_1, \dots, j_k) \mid j_1, \dots, j_k \in \{0, 1, \dots, 2^n - 1\}, C_{j_1 \dots j_k}^n \neq \emptyset \}.$$

We fix a measurable function  $\gamma: X \rightarrow \text{Prob}(k)$  and treat  $\text{Prob}(k)$  as a subset of  $[0, 1]^k$ . For each  $n \in \mathbb{N}$ , we define a measurable partition  $\{C_{j_1 \dots j_k}^n\}_{j_1, \dots, j_k \in \{0, 1, \dots, 2^n - 1\}}$  of  $X$  by

$$\begin{aligned} C_{j_1 \dots j_k}^n &= \gamma^{-1}(B_{j_1 \dots j_k}^n) \\ &\text{where } B_{j_1 \dots j_k}^n = D_{j_1} \times \dots \times D_{j_k} \quad ((j_1 \dots j_k) \in J_n), \\ &D_0^n = \{0\} \text{ and } D_{l+1}^n = (l/2^n, (l+1)/2^n] \quad (l = 0, 1, 2, \dots, 2^n - 1). \end{aligned}$$

We next define  $m_n^*: X \rightarrow J_n$  and  $m_n: J_n \rightarrow X$  as follows:  $m_n^*(x)$  is the unique element  $(j_1, \dots, j_k) \in J_n$  satisfying  $x \in C_{j_1, \dots, j_k}^n$ , and we choose  $m_n(j_1, \dots, j_k)$  is an element of  $C_{j_1, \dots, j_k}^n$ . Thanks to the measurability of each  $C_{j_1, \dots, j_k}^n$ , the function  $m_n^*$  is measurable, and the measurability of  $m_n$  follows from the discreteness of  $J_n$ . From the construction of  $\{C_{j_1 \dots j_k}^n\}_{j_1, \dots, j_k \in \{0, 1, \dots, 2^n - 1\}}$ , for any  $n \in \mathbb{N}$ ,  $x \in X$ , and  $i \in I$ , we have,

$$|\gamma(x)(i) - (\gamma \circ m_n \circ m_n^*)(x)(i)| \leq 1/2^n$$

This implies that the sequence  $\{\gamma \circ m_n \circ m_n^*\}_{n=1}^\infty$  of measurable function converges uniformly to  $\gamma$ . Hence, for any  $n \in \mathbb{N}$  and  $D \subseteq k$ , we have

$$\left| \int \gamma(x)(D) d\mu_1(x) - \int (\gamma \circ m_n \circ m_n^*)(x)(D) d\mu_1(x) \right| \leq 1/2^n$$

Hence the sequence of probability measures  $\{(\gamma \circ m_n \circ m_n^*)(\mu_1)\}_{n=1}^\infty$  converges to the probability measure  $\gamma(\mu_1)$ . Similarly,  $\{(\gamma \circ m_n \circ m_n^*)(\mu_2)\}_{n=1}^\infty$  converges to  $\gamma(\mu_2)$ .

By the continuity of  $F$ , we obtain

$$\begin{aligned}
& F((\gamma(\mu_1))(A_1), \dots, (\gamma(\mu_1))(A_k), (\gamma(\mu_2))(A_1), \dots, (\gamma(\mu_2))(A_k)) \\
&= \lim_{n \rightarrow \infty} F \left( \begin{array}{c} ((\gamma \circ m_n \circ m_n^*)(\mu_1))(A_1), \dots, ((\gamma \circ m_n \circ m_n^*)(\mu_1))(A_k), \\ ((\gamma \circ m_n \circ m_n^*)(\mu_2))(A_1), \dots, ((\gamma \circ m_n \circ m_n^*)(\mu_2))(A_k) \end{array} \right) \\
&= \lim_{n \rightarrow \infty} F \left( \begin{array}{c} ((\gamma \circ m_n)(m_n^*(\mu_1)))(A_1), \dots, ((\gamma \circ m_n)(m_n^*(\mu_1)))(A_k), \\ ((\gamma \circ m_n)(m_n^*(\mu_2)))(A_1), \dots, ((\gamma \circ m_n)(m_n^*(\mu_2)))(A_k) \end{array} \right) \\
&\leq \sup_{n \in \mathbb{N}} \Delta_{\{1, 2, \dots, k\}}(((\gamma \circ m_n)(m_n^*(\mu_1))), ((\gamma \circ m_n)(m_n^*(\mu_2)))) \\
&\quad \{\text{Since } J_n \text{ is finite (countable and discrete), we can apply Theorem 22.}\} \\
&\leq \sup_{n \in \mathbb{N}} \Delta_{J_n}(m_n^*(\mu_1), m_n^*(\mu_2)) \\
&= \sup_{n \in \mathbb{N}} \sup \left\{ F \left( \begin{array}{c} f(m_n^*(\mu_1))(1), \dots, f(m_n^*(\mu_1))(k), \\ f(m_n^*(\mu_2))(1), \dots, f(m_n^*(\mu_2))(k) \end{array} \right) \middle| f: J_n \rightarrow \{1, 2, \dots, k\} \right\} \\
&\leq \sup \{ F((g(\mu_1))(1), \dots, (g(\mu_1))(k), (g(\mu_2))(1), \dots, (g(\mu_2))(k)) \mid g: X \rightarrow \{1, 2, \dots, k\} \} \\
&= \Delta_X(\mu_1, \mu_2).
\end{aligned}$$

This implies  $\sup_{\gamma: X \rightarrow \text{Prob}(k)} \Delta_k(\gamma(\mu_1), \gamma(\mu_2)) \leq \Delta_X(\mu_1, \mu_2)$ .  $\square$

## C Additional Results

### C.1 Total variation distance is 2-generated

We recall the definition of the total variation distance

$$\text{TV}_X(\mu_1 || \mu_2) = \sup_{S \subseteq X} |\Pr[\mu_1 \in S] - \Pr[\mu_2 \in S]|.$$

In a similar way as  $\varepsilon$ -divergence  $\Delta^\varepsilon$ , we can prove 2-generatedness of the total variation distance  $\text{TV}$ , but we can prove it easily by applying Theorems 16–17 (Theorems 20 and 22 in the paper).

Define  $F: [0, 1]^4 \rightarrow [0, \infty]$  by  $F(x, x', y, y') = |x - y|$ . It is easy to check that the function is obviously quasi-convex, and that we have  $\text{TV} = \Delta^F$ .

### C.2 An optimal conversion law from Hellinger to DP

We recall the definition of the Hellinger distance

$$\text{HD}_X(\mu_1 || \mu_2) = 1 - \sum_{x \in X} \sqrt{\mu_1(x)\mu_2(x)}.$$

Since it is the  $f$ -divergence of weight function  $w(t) = \sqrt{t} - 1$  (strict convex), the Hellinger distance is exactly  $\infty$ -generated, quasi-convex and continuous.

Here is the essence of an optimal conversion law from the Hellinger distance to DP.



**Lemma 19.** We have  $R^{\text{HD}}(\rho) \subseteq R^{\Delta^\varepsilon}(\delta(\varepsilon, \rho))$  where

$$\delta(\varepsilon, \rho) = 1 - t - \frac{f(t)}{g(t)} \quad (1)$$

$$t = \frac{z^2 + 4 - z\sqrt{z^2 + 4}}{2(z^2 + 4)} \quad (2)$$

$$z = \frac{1/e^\varepsilon - 2(1 - \rho) + 1}{(1 - \rho)\sqrt{\rho(2 - \rho)}}$$

$$f(x) = (1 - \rho)^2(1 - 2x) + x - 2(1 - \rho)\sqrt{d(2 - d)x(1 - x)}$$

$$g(x) = \frac{df}{dx}(x) = (1 - \rho)^2(1 - 2x) + x - 2(1 - \rho)\sqrt{d(2 - d)x(1 - x)}$$

*Proof.* We may regard

$$R^{\text{HD}}(\rho) = \left\{ (x, y) \in [0, 1]^2 \mid 1 - \sqrt{x(1 - y)} - \sqrt{(1 - x)y} \leq \rho \right\},$$

$$R^{\Delta^\varepsilon}(\delta) = \left\{ (x, y) \in [0, 1]^2 \mid \max((1 - x) - e^\varepsilon y, x - e^\varepsilon(1 - y)) \leq \delta \right\}.$$

We first calculate the boundary of  $R^{\text{HD}}(\rho)$ . Thus, we solve the following equation for  $y$ :

$$1 - \sqrt{x(1 - y)} - \sqrt{(1 - x)y} = \rho.$$

We first have

$$1 - \sqrt{x(1 - y)} - \sqrt{(1 - x)y} = \rho$$

$$\iff (1 - \rho)^2 - x(1 - y) - y(1 - x) = 2\sqrt{x(1 - x)y(1 - y)}$$

$$\iff (1 - \rho)^4 + x^2(1 - y)^2 + y^2(1 - x)^2 - 2x(1 - y)(1 - \rho)^2 - 2y(1 - x)(1 - \rho)^2$$

The degree of this equation is 2, so we can solve it. For given  $x \in [0, 1]$ , we have

$$y = (1 - \rho)^2(1 - 2x) + x \pm 2(1 - \rho)\sqrt{x(1 - x)\rho(2 - \rho)}.$$

Thanks to the Symmetry of  $R^{\text{HD}}(\rho)$  and  $R^{\Delta^\varepsilon}(\delta)$ , we may consider the curve:

$$y = (1 - \rho)^2(1 - 2x) + x - 2(1 - \rho)\sqrt{x(1 - x)\rho(2 - \rho)} = f(x).$$

The tangent of the curve  $y = f(x)$  that passes the point  $(t, f(t))$  is given by the equation  $x - \frac{y}{g(t)} = t - \frac{f(t)}{g(t)}$  where  $g(x) = \frac{df}{dx}(x)$ . We next find  $t$  and  $\delta$  that the lower boundary

$$(1 - x) - e^\varepsilon y = \delta \iff x + e^\varepsilon y = 1 - \delta$$

of  $R^{\Delta^\varepsilon}(\delta(\varepsilon, \rho))$  is the same as the line  $x - \frac{y}{g(t)} = t - \frac{f(t)}{g(t)}$ . We solve the equation  $e^\varepsilon = \frac{1}{g(t)}$  on  $t$  about the slope as (2). Finally, we obtain  $\delta$  as (1).  $\square$

We conclude an optimal conversion law from the Hellinger distance to DP.

**Theorem 20.** We always have  $\text{HD}_X(d_1, d_2) \leq \rho \implies \Delta_X^\varepsilon(d_1, d_2) \leq \delta(\varepsilon, \rho)$  where  $\delta(\varepsilon, \rho)$  is given by (1).

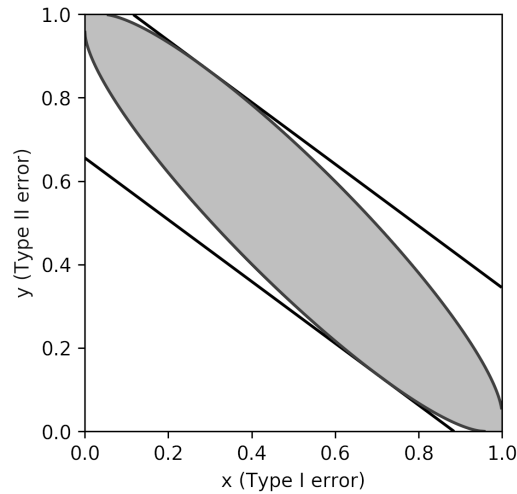

Figure 1: Comparison of the privacy region for DP and the one for 2-cut of Hellinger distance.

## References

- [Barthe and Olmedo, 2013] Barthe, G. and Olmedo, F. (2013). Beyond differential privacy: Composition theorems and relational logic for  $f$ -divergences between probabilistic programs. In *International Colloquium on Automata, Languages and Programming (ICALP), Riga, Latvia*, volume 7966 of *Lecture Notes in Computer Science*, pages 49–60. Springer-Verlag.
- [Giry, 1982] Giry, M. (1982). A categorical approach to probability theory. In Banaschewski, B., editor, *Categorical Aspects of Topology and Analysis*, volume 915 of *Lecture Notes in Mathematics*, pages 68–85. Springer-Verlag.
- [Liese and Vajda, 2006] Liese, F. and Vajda, I. (2006). On divergences and informations in statistics and information theory. *IEEE Transactions on Information Theory*, 52(10):4394–4412.
- [Mironov, 2017] Mironov, I. (2017). Rényi differential privacy. In *IEEE Computer Security Foundations Symposium (CSF), Santa Barbara, California*, pages 263–275.
